# Supplementary material for: Practical computation of electronic excitation in solution: vertical excitation model
Source: Royal Society of Chemistry journal article supplement (doi:10.1039/c1sc00313e), 2011-01-01
Supplement: c1sc00313e_2.pdf [file c1sc00313e_2.pdf]

## **Electronic Supplementary Information Part II**

### **Practical computation of electronic excitation in solution: vertical excitation model**

**Aleksandr V. Marenich,<sup>a</sup> Christopher J. Cramer,<sup>a</sup> Donald G. Truhlar,<sup>a</sup> Ciro A. Guido,<sup>b</sup>  
Benedetta Mennucci,<sup>c</sup> Giovanni Scalmani,<sup>d</sup> and Michael J. Frisch<sup>d</sup>**

<sup>a</sup> *Department of Chemistry and Supercomputing Institute, University of Minnesota, 207 Pleasant Street S.E., Minneapolis, MN 55455-0431, USA*

<sup>b</sup> *Scuola Normale Superiore di Pisa, Piazza dei Cavalieri 7, 56100 Pisa, Italy*

<sup>c</sup> *Dipartimento di Chimica e Chimica Industriale, Via Risorgimento 35, 56126 Pisa, Italy*

<sup>d</sup> *Gaussian, Inc., 340 Quinnipiac Street, Building 40, Wallingford, Connecticut 06492, USA*

***Prepared on 22nd July 2011***

**Contents:** Cartesian coordinates of solute molecules (in Å)

**Number of pages:** 8

acetone in gas  
8 0.000000 0.000000 1.389623  
6 0.000000 0.000000 0.185718  
6 0.000000 1.283709 -0.610247  
6 0.000000 -1.283709 -0.610247  
1 0.000000 2.136862 0.060961  
1 0.000000 -2.136862 0.060961  
1 0.877283 1.319182 -1.257563  
1 0.877283 -1.319182 -1.257563  
1 -0.877283 1.319182 -1.257563  
1 -0.877283 -1.319182 -1.257563

acetone in n-hexane  
8 0.000000 0.000000 1.391018  
6 0.000000 0.000000 0.184805  
6 0.000000 1.281337 -0.609856  
6 0.000000 -1.281337 -0.609856  
1 0.000000 2.138759 0.056941  
1 0.000000 -2.138759 0.056941  
1 0.877165 1.315998 -1.258147  
1 0.877165 -1.315998 -1.258147  
1 -0.877165 1.315998 -1.258147  
1 -0.877165 -1.315998 -1.258147

acetone in water  
8 0.000000 0.000000 1.393231  
6 0.000000 0.000000 0.175962  
6 0.000000 1.277595 -0.607353  
6 0.000000 -1.277595 -0.607353  
1 0.000000 2.138501 0.056265  
1 0.000000 -2.138501 0.056265  
1 0.877264 1.305459 -1.256477  
1 0.877264 -1.305459 -1.256477  
1 -0.877264 1.305459 -1.256477  
1 -0.877264 -1.305459 -1.256477

acrolein in gas  
6 -0.151176 -0.744097 0.000000  
6 0.000000 0.723075 0.000000  
6 1.207902 1.271620 0.000000  
8 -1.210139 -1.311458 0.000000  
1 0.800471 -1.310542 0.000000  
1 -0.911795 1.306957 0.000000  
1 1.356361 2.342250 0.000000  
1 2.095718 0.649410 0.000000

acrolein in n-hexane  
6 -0.152670 -0.739822 0.000000  
6 0.000000 0.724264 0.000000  
6 1.211953 1.264825 0.000000  
8 -1.213446 -1.309252 0.000000  
1 0.796624 -1.308587 0.000000  
1 -0.908176 1.314212 0.000000  
1 1.366754 2.335193 0.000000  
1 2.096667 0.637598 0.000000

acrolein in water  
6 -0.147500 -0.734358 0.000000  
6 0.000000 0.721333 0.000000  
6 1.216256 1.257348 0.000000  
8 -1.220846 -1.303210 0.000000  
1 0.791264 -1.312027 0.000000  
1 -0.905941 1.316034 0.000000  
1 1.369856 2.328723 0.000000  
1 2.099054 0.627012 0.000000

coumarin 153 in gas  
6 -0.929513 -0.143133 -0.011826  
6 -0.192930 1.046469 -0.016562  
6 1.195566 1.077383 -0.018403  
6 1.893012 -0.146803 -0.030000  
6 1.167408 -1.372101 -0.035640  
6 -0.207991 -1.346413 -0.016082  
6 1.907843 2.408875 -0.005740  
6 3.986689 1.076532 -0.320352

|   |           |           |           |
|---|-----------|-----------|-----------|
| 6 | 3.360667  | 2.245066  | 0.424215  |
| 6 | 3.994735  | -1.391178 | -0.269373 |
| 6 | 3.321266  | -2.555764 | 0.438719  |
| 6 | 1.896250  | -2.696418 | -0.081551 |
| 1 | 1.341224  | -3.437833 | 0.497082  |
| 1 | 3.889970  | -3.471693 | 0.268449  |
| 1 | 1.858872  | 2.854610  | -1.005278 |
| 1 | -0.741742 | -2.289562 | -0.013835 |
| 1 | 3.924593  | 3.158431  | 0.226938  |
| 7 | 3.273415  | -0.154042 | -0.014892 |
| 1 | 3.979229  | 1.271480  | -1.404179 |
| 1 | 5.026373  | 0.938819  | -0.016696 |
| 1 | 3.414382  | 2.041549  | 1.496983  |
| 1 | 1.379935  | 3.095662  | 0.657503  |
| 1 | 5.014628  | -1.257279 | 0.097663  |
| 1 | 4.056228  | -1.593792 | -1.350249 |
| 1 | 3.312574  | -2.357212 | 1.513898  |
| 1 | 1.925862  | -3.058299 | -1.115523 |
| 6 | -2.365211 | -0.019630 | -0.003089 |
| 6 | -2.965778 | 1.183109  | -0.002296 |
| 6 | -2.181052 | 2.415996  | -0.010112 |
| 6 | -3.206983 | -1.269980 | 0.004891  |
| 9 | -2.960088 | -2.026466 | -1.073363 |
| 9 | -2.945118 | -2.023219 | 1.081769  |
| 9 | -4.513449 | -1.003054 | 0.013490  |
| 1 | -4.039048 | 1.303176  | 0.004517  |
| 8 | -0.812801 | 2.261857  | -0.019294 |
| 8 | -2.628819 | 3.523497  | -0.009566 |

coumarin 153 in cyclohexane

|   |           |           |           |
|---|-----------|-----------|-----------|
| 6 | -0.930433 | -0.143124 | -0.018281 |
| 6 | -0.192200 | 1.046625  | -0.023901 |
| 6 | 1.195320  | 1.079625  | -0.027960 |
| 6 | 1.894463  | -0.146419 | -0.040725 |
| 6 | 1.166533  | -1.373359 | -0.047536 |
| 6 | -0.207985 | -1.347587 | -0.024789 |
| 6 | 1.911331  | 2.409346  | -0.011985 |
| 6 | 3.993434  | 1.077042  | -0.308949 |
| 6 | 3.359512  | 2.242601  | 0.432289  |
| 6 | 4.001268  | -1.394192 | -0.250604 |
| 6 | 3.314164  | -2.556615 | 0.446607  |
| 6 | 1.897747  | -2.695884 | -0.096163 |
| 1 | 1.334932  | -3.444093 | 0.465765  |
| 1 | 3.884472  | -3.472604 | 0.282042  |
| 1 | 1.875398  | 2.854045  | -1.012551 |
| 1 | -0.739177 | -2.292292 | -0.022108 |
| 1 | 3.925312  | 3.156102  | 0.241032  |
| 7 | 3.269786  | -0.154786 | -0.026847 |
| 1 | 4.005142  | 1.277797  | -1.390859 |
| 1 | 5.026647  | 0.932458  | 0.011694  |
| 1 | 3.402252  | 2.038813  | 1.505596  |
| 1 | 1.381708  | 3.099089  | 0.646915  |
| 1 | 5.009944  | -1.253455 | 0.142953  |
| 1 | 4.090898  | -1.601708 | -1.327644 |
| 1 | 3.288914  | -2.361860 | 1.522381  |
| 1 | 1.944875  | -3.046571 | -1.133276 |
| 6 | -2.364167 | -0.018152 | -0.002816 |
| 6 | -2.966881 | 1.185032  | 0.001586  |
| 6 | -2.180374 | 2.413320  | -0.009301 |
| 6 | -3.207256 | -1.267588 | 0.008808  |
| 9 | -2.969264 | -2.026195 | -1.070629 |
| 9 | -2.943724 | -2.023622 | 1.083999  |
| 9 | -4.514346 | -1.000993 | 0.023842  |
| 1 | -4.040391 | 1.304815  | 0.013657  |
| 8 | -0.815999 | 2.261244  | -0.024527 |
| 8 | -2.626537 | 3.524533  | -0.006752 |

coumarin 153 in dimethyl sulfoxide

|   |           |           |           |
|---|-----------|-----------|-----------|
| 6 | -0.932545 | -0.142648 | -0.019826 |
| 6 | -0.192092 | 1.047529  | -0.028939 |
| 6 | 1.194176  | 1.083706  | -0.037462 |
| 6 | 1.896500  | -0.144949 | -0.052061 |
| 6 | 1.164982  | -1.374108 | -0.061215 |
| 6 | -0.208425 | -1.349014 | -0.031380 |
| 6 | 1.915221  | 2.410873  | -0.025465 |

|   |           |           |           |
|---|-----------|-----------|-----------|
| 6 | 3.999420  | 1.078798  | -0.295675 |
| 6 | 3.355662  | 2.240608  | 0.440785  |
| 6 | 4.009706  | -1.396643 | -0.221820 |
| 6 | 3.302278  | -2.556706 | 0.456246  |
| 6 | 1.900123  | -2.692549 | -0.121715 |
| 1 | 1.324587  | -3.454038 | 0.408438  |
| 1 | 3.875380  | -3.472232 | 0.300755  |
| 1 | 1.900921  | 2.843012  | -1.032152 |
| 1 | -0.735053 | -2.296717 | -0.028965 |
| 1 | 3.925534  | 3.153098  | 0.258185  |
| 7 | 3.263813  | -0.154843 | -0.041285 |
| 1 | 4.031736  | 1.285076  | -1.374929 |
| 1 | 5.024033  | 0.925047  | 0.045284  |
| 1 | 3.381948  | 2.036347  | 1.514944  |
| 1 | 1.382363  | 3.110618  | 0.620347  |
| 1 | 5.000616  | -1.244749 | 0.209807  |
| 1 | 4.140616  | -1.608710 | -1.292327 |
| 1 | 3.251294  | -2.368084 | 1.532687  |
| 1 | 1.975853  | -3.016774 | -1.165683 |
| 6 | -2.362895 | -0.017048 | 0.001065  |
| 6 | -2.970764 | 1.185591  | 0.008348  |
| 6 | -2.184603 | 2.409123  | -0.007443 |
| 6 | -3.203955 | -1.266969 | 0.013047  |
| 9 | -2.971375 | -2.021708 | -1.071279 |
| 9 | -2.934892 | -2.028248 | 1.084087  |
| 9 | -4.512554 | -1.006089 | 0.036013  |
| 1 | -4.044853 | 1.302516  | 0.024316  |
| 8 | -0.822136 | 2.262026  | -0.029201 |
| 8 | -2.628989 | 3.525517  | -0.004555 |

indolinedimethine-malononitrile in gas

|   |           |           |           |
|---|-----------|-----------|-----------|
| 6 | 2.139370  | 1.149839  | 0.000000  |
| 6 | 2.298144  | -0.234267 | 0.000000  |
| 6 | 3.562116  | -0.789313 | 0.000000  |
| 6 | 4.672382  | 0.059102  | 0.000000  |
| 6 | 4.498820  | 1.438169  | 0.000000  |
| 6 | 3.226149  | 2.010725  | 0.000000  |
| 6 | 0.936620  | -0.899751 | 0.000000  |
| 1 | 3.694373  | -1.866090 | 0.000000  |
| 1 | 5.671076  | -0.358371 | 0.000000  |
| 1 | 5.366114  | 2.086928  | 0.000000  |
| 1 | 3.111454  | 3.086677  | 0.000000  |
| 7 | 0.767516  | 1.448327  | 0.000000  |
| 6 | 0.207670  | 2.783410  | 0.000000  |
| 1 | -0.408793 | 2.936865  | 0.889059  |
| 1 | 1.014052  | 3.511364  | 0.000000  |
| 1 | -0.408793 | 2.936865  | -0.889059 |
| 6 | 0.767516  | -1.746074 | 1.272854  |
| 1 | -0.206562 | -2.234125 | 1.312493  |
| 1 | 1.537518  | -2.520480 | 1.295442  |
| 1 | 0.879242  | -1.126292 | 2.163991  |
| 6 | 0.767516  | -1.746074 | -1.272854 |
| 1 | 1.537518  | -2.520480 | -1.295442 |
| 1 | -0.206562 | -2.234125 | -1.312493 |
| 1 | 0.879242  | -1.126292 | -2.163991 |
| 6 | 0.005751  | 0.317802  | 0.000000  |
| 6 | -1.363604 | 0.362847  | 0.000000  |
| 6 | -2.211962 | -0.770878 | 0.000000  |
| 1 | -1.780926 | -1.764061 | 0.000000  |
| 6 | -3.578134 | -0.719855 | 0.000000  |
| 6 | -4.262628 | 0.533903  | 0.000000  |
| 6 | -4.354772 | -1.917251 | 0.000000  |
| 7 | -4.762619 | 1.571182  | 0.000000  |
| 7 | -4.961465 | -2.895861 | 0.000000  |
| 1 | -1.848694 | 1.332073  | 0.000000  |

indolinedimethine-malononitrile in cyclohexane

|   |          |           |          |
|---|----------|-----------|----------|
| 6 | 2.142352 | 1.147882  | 0.000000 |
| 6 | 2.299288 | -0.235936 | 0.000000 |
| 6 | 3.563088 | -0.793011 | 0.000000 |
| 6 | 4.672888 | 0.055903  | 0.000000 |
| 6 | 4.500742 | 1.435826  | 0.000000 |
| 6 | 3.228657 | 2.009668  | 0.000000 |
| 6 | 0.937062 | -0.898865 | 0.000000 |
| 1 | 3.694766 | -1.869700 | 0.000000 |

|   |           |           |           |
|---|-----------|-----------|-----------|
| 1 | 5.671526  | -0.362315 | 0.000000  |
| 1 | 5.368780  | 2.083850  | 0.000000  |
| 1 | 3.112774  | 3.085532  | 0.000000  |
| 7 | 0.768500  | 1.446736  | 0.000000  |
| 6 | 0.216683  | 2.787321  | 0.000000  |
| 1 | -0.396364 | 2.944600  | 0.890251  |
| 1 | 1.028288  | 3.509602  | 0.000000  |
| 1 | -0.396364 | 2.944600  | -0.890251 |
| 6 | 0.768500  | -1.747419 | 1.271070  |
| 1 | -0.200523 | -2.246163 | 1.306001  |
| 1 | 1.544106  | -2.516424 | 1.293445  |
| 1 | 0.872392  | -1.132399 | 2.166820  |
| 6 | 0.768500  | -1.747419 | -1.271070 |
| 1 | 1.544106  | -2.516424 | -1.293445 |
| 1 | -0.200523 | -2.246163 | -1.306001 |
| 1 | 0.872392  | -1.132399 | -2.166820 |
| 6 | 0.010034  | 0.322129  | 0.000000  |
| 6 | -1.366135 | 0.371457  | 0.000000  |
| 6 | -2.208462 | -0.756919 | 0.000000  |
| 1 | -1.776095 | -1.749423 | 0.000000  |
| 6 | -3.581360 | -0.714857 | 0.000000  |
| 6 | -4.278364 | 0.528884  | 0.000000  |
| 6 | -4.347854 | -1.915859 | 0.000000  |
| 7 | -4.793997 | 1.558872  | 0.000000  |
| 7 | -4.952808 | -2.896104 | 0.000000  |
| 1 | -1.844836 | 1.343974  | 0.000000  |

indolinedimethine-malononitrile in acetonitrile

|   |           |           |           |
|---|-----------|-----------|-----------|
| 6 | 2.149394  | 1.141067  | 0.000000  |
| 6 | 2.303546  | -0.242255 | 0.000000  |
| 6 | 3.567067  | -0.802892 | 0.000000  |
| 6 | 4.676477  | 0.047687  | 0.000000  |
| 6 | 4.505782  | 1.429869  | 0.000000  |
| 6 | 3.233849  | 2.005735  | 0.000000  |
| 6 | 0.941736  | -0.901318 | 0.000000  |
| 1 | 3.694594  | -1.880203 | 0.000000  |
| 1 | 5.675737  | -0.370512 | 0.000000  |
| 1 | 5.374653  | 2.077368  | 0.000000  |
| 1 | 3.115782  | 3.081491  | 0.000000  |
| 7 | 0.771772  | 1.439374  | 0.000000  |
| 6 | 0.224410  | 2.786953  | 0.000000  |
| 1 | -0.386990 | 2.940222  | 0.891026  |
| 1 | 1.040085  | 3.503954  | 0.000000  |
| 1 | -0.386990 | 2.940222  | -0.891026 |
| 6 | 0.771772  | -1.750199 | 1.271038  |
| 1 | -0.193047 | -2.257709 | 1.294114  |
| 1 | 1.555902  | -2.510602 | 1.290912  |
| 1 | 0.865591  | -1.132488 | 2.166599  |
| 6 | 0.771772  | -1.750199 | -1.271038 |
| 1 | 1.555902  | -2.510602 | -1.290912 |
| 1 | -0.193047 | -2.257709 | -1.294114 |
| 1 | 0.865591  | -1.132488 | -2.166599 |
| 6 | 0.021564  | 0.322091  | 0.000000  |
| 6 | -1.366188 | 0.376490  | 0.000000  |
| 6 | -2.198819 | -0.743615 | 0.000000  |
| 1 | -1.770452 | -1.738242 | 0.000000  |
| 6 | -3.583865 | -0.702475 | 0.000000  |
| 6 | -4.290796 | 0.529907  | 0.000000  |
| 6 | -4.350170 | -1.897283 | 0.000000  |
| 7 | -4.837788 | 1.545451  | 0.000000  |
| 7 | -4.968833 | -2.871158 | 0.000000  |
| 1 | -1.834560 | 1.354252  | 0.000000  |

julolidine-malononitrile in gas

|   |           |           |           |
|---|-----------|-----------|-----------|
| 6 | 1.188332  | -0.549781 | -0.044784 |
| 6 | 0.251366  | -1.596551 | -0.047886 |
| 6 | -1.110227 | -1.382427 | -0.064600 |
| 6 | -1.600493 | -0.051115 | -0.065053 |
| 6 | -0.669715 | 1.023510  | -0.079951 |
| 6 | 0.683338  | 0.762789  | -0.061730 |
| 6 | -2.067365 | -2.552395 | -0.089400 |
| 6 | -3.903163 | -0.888939 | -0.220623 |
| 6 | -3.424910 | -2.153432 | 0.475954  |
| 6 | -3.464110 | 1.544586  | -0.226142 |
| 6 | -2.564060 | 2.566264  | 0.450474  |

|   |           |           |           |
|---|-----------|-----------|-----------|
| 6 | -1.158848 | 2.453242  | -0.126737 |
| 1 | -0.460115 | 3.094787  | 0.413401  |
| 1 | -2.968281 | 3.568770  | 0.300108  |
| 1 | -2.194023 | -2.897886 | -1.121574 |
| 1 | 0.610610  | -2.621975 | -0.037237 |
| 1 | 1.356141  | 1.610466  | -0.065745 |
| 1 | -4.156658 | -2.950692 | 0.334405  |
| 7 | -2.951087 | 0.195667  | -0.031202 |
| 1 | -4.057742 | -1.084476 | -1.292411 |
| 1 | -4.859557 | -0.563107 | 0.193685  |
| 1 | -3.342156 | -1.956821 | 1.548309  |
| 1 | -1.641507 | -3.385507 | 0.473704  |
| 1 | -4.469233 | 1.577980  | 0.199675  |
| 1 | -3.552570 | 1.772377  | -1.298955 |
| 1 | -2.546303 | 2.366857  | 1.525420  |
| 1 | -1.166910 | 2.798722  | -1.166600 |
| 6 | 2.581450  | -0.912007 | -0.021681 |
| 1 | 2.769188  | -1.982346 | -0.027461 |
| 6 | 3.708774  | -0.151164 | 0.008717  |
| 6 | 3.730026  | 1.278411  | 0.028504  |
| 6 | 4.988269  | -0.795572 | 0.026042  |
| 7 | 3.752160  | 2.429043  | 0.045166  |
| 7 | 6.008517  | -1.327519 | 0.039556  |

julolidine-malononitrile in cyclohexane

|   |           |           |           |
|---|-----------|-----------|-----------|
| 6 | 1.188610  | -0.547555 | -0.026737 |
| 6 | 0.249905  | -1.596596 | -0.043460 |
| 6 | -1.109823 | -1.383573 | -0.073226 |
| 6 | -1.602444 | -0.049445 | -0.070116 |
| 6 | -0.669239 | 1.028541  | -0.070323 |
| 6 | 0.681609  | 0.767059  | -0.040003 |
| 6 | -2.068284 | -2.551334 | -0.115404 |
| 6 | -3.906201 | -0.888225 | -0.226552 |
| 6 | -3.423812 | -2.157306 | 0.456961  |
| 6 | -3.468476 | 1.549225  | -0.204610 |
| 6 | -2.562585 | 2.560779  | 0.477516  |
| 6 | -1.163120 | 2.455987  | -0.113872 |
| 1 | -0.461075 | 3.100591  | 0.418120  |
| 1 | -2.969333 | 3.564108  | 0.341448  |
| 1 | -2.197147 | -2.879403 | -1.152845 |
| 1 | 0.609630  | -2.621804 | -0.035699 |
| 1 | 1.352718  | 1.616186  | -0.029868 |
| 1 | -4.156431 | -2.952368 | 0.308058  |
| 7 | -2.946456 | 0.195479  | -0.051683 |
| 1 | -4.076023 | -1.075633 | -1.296463 |
| 1 | -4.853839 | -0.559301 | 0.203979  |
| 1 | -3.339582 | -1.973439 | 1.531666  |
| 1 | -1.642546 | -3.393221 | 0.434388  |
| 1 | -4.465696 | 1.567210  | 0.239234  |
| 1 | -3.575632 | 1.796203  | -1.270464 |
| 1 | -2.534865 | 2.350277  | 1.550313  |
| 1 | -1.185303 | 2.800057  | -1.153986 |
| 6 | 2.575425  | -0.910382 | 0.003781  |
| 1 | 2.760544  | -1.981184 | 0.021869  |
| 6 | 3.709710  | -0.150796 | 0.012722  |
| 6 | 3.740538  | 1.276500  | -0.011353 |
| 6 | 4.984451  | -0.799891 | 0.042873  |
| 7 | 3.770678  | 2.427056  | -0.030365 |
| 7 | 6.003920  | -1.333424 | 0.067917  |

julolidine-malononitrile in acetonitrile

|   |           |           |           |
|---|-----------|-----------|-----------|
| 6 | 1.185966  | -0.549944 | -0.033608 |
| 6 | 0.241688  | -1.601353 | -0.053545 |
| 6 | -1.114576 | -1.387054 | -0.089649 |
| 6 | -1.608257 | -0.046506 | -0.085069 |
| 6 | -0.667823 | 1.034714  | -0.089837 |
| 6 | 0.678951  | 0.770008  | -0.053576 |
| 6 | -2.079194 | -2.548223 | -0.137764 |
| 6 | -3.915763 | -0.883832 | -0.199058 |
| 6 | -3.418476 | -2.153335 | 0.470170  |
| 6 | -3.475149 | 1.557774  | -0.166713 |
| 6 | -2.546854 | 2.563053  | 0.491160  |
| 6 | -1.167152 | 2.458550  | -0.144283 |
| 1 | -0.449504 | 3.115375  | 0.350763  |
| 1 | -2.958494 | 3.565739  | 0.366817  |

|   |           |           |           |
|---|-----------|-----------|-----------|
| 1 | -2.235026 | -2.848487 | -1.179874 |
| 1 | 0.602788  | -2.626019 | -0.043060 |
| 1 | 1.350698  | 1.619316  | -0.045110 |
| 1 | -4.157291 | -2.944557 | 0.333520  |
| 7 | -2.940293 | 0.199006  | -0.069007 |
| 1 | -4.120402 | -1.069250 | -1.261453 |
| 1 | -4.842748 | -0.543055 | 0.263760  |
| 1 | -3.308262 | -1.974883 | 1.543814  |
| 1 | -1.644661 | -3.404041 | 0.382458  |
| 1 | -4.450219 | 1.558023  | 0.322253  |
| 1 | -3.629862 | 1.817419  | -1.221978 |
| 1 | -2.486016 | 2.352183  | 1.562856  |
| 1 | -1.232077 | 2.780080  | -1.189906 |
| 6 | 2.561164  | -0.915440 | 0.004038  |
| 1 | 2.743477  | -1.986864 | 0.024120  |
| 6 | 3.705180  | -0.155490 | 0.018189  |
| 6 | 3.756921  | 1.267731  | -0.008798 |
| 6 | 4.973558  | -0.807801 | 0.056678  |
| 7 | 3.822266  | 2.417957  | -0.030573 |
| 7 | 5.997527  | -1.335262 | 0.088294  |

methanal (formaldehyde) in gas

|   |          |           |           |
|---|----------|-----------|-----------|
| 8 | 0.000000 | 0.000000  | 0.670064  |
| 6 | 0.000000 | 0.000000  | -0.525154 |
| 1 | 0.000000 | 0.938446  | -1.104794 |
| 1 | 0.000000 | -0.938446 | -1.104794 |

methanal (formaldehyde) in n-hexane

|   |          |           |           |
|---|----------|-----------|-----------|
| 8 | 0.000000 | 0.000000  | 0.670936  |
| 6 | 0.000000 | 0.000000  | -0.525991 |
| 1 | 0.000000 | 0.938274  | -1.105770 |
| 1 | 0.000000 | -0.938274 | -1.105770 |

methanal (formaldehyde) in water

|   |          |           |           |
|---|----------|-----------|-----------|
| 8 | 0.000000 | 0.000000  | 0.674199  |
| 6 | 0.000000 | 0.000000  | -0.531116 |
| 1 | 0.000000 | 0.938483  | -1.103447 |
| 1 | 0.000000 | -0.938483 | -1.103447 |

methylenecyclopropene in gas

|   |          |           |           |
|---|----------|-----------|-----------|
| 6 | 0.000000 | 0.655327  | -1.013929 |
| 6 | 0.000000 | -0.655327 | -1.013929 |
| 1 | 0.000000 | 1.567170  | -1.584575 |
| 1 | 0.000000 | -1.567170 | -1.584575 |
| 6 | 0.000000 | 0.000000  | 0.260147  |
| 6 | 0.000000 | 0.000000  | 1.583914  |
| 1 | 0.000000 | -0.927546 | 2.135967  |
| 1 | 0.000000 | 0.927546  | 2.135967  |

methylenecyclopropene in n-pentane

|   |          |           |           |
|---|----------|-----------|-----------|
| 6 | 0.000000 | 0.655638  | -1.013409 |
| 6 | 0.000000 | -0.655638 | -1.013409 |
| 1 | 0.000000 | 1.570067  | -1.580763 |
| 1 | 0.000000 | -1.570067 | -1.580763 |
| 6 | 0.000000 | 0.000000  | 0.257835  |
| 6 | 0.000000 | 0.000000  | 1.583841  |
| 1 | 0.000000 | -0.928242 | 2.136190  |
| 1 | 0.000000 | 0.928242  | 2.136190  |

methylenecyclopropene in methanol

|   |          |           |           |
|---|----------|-----------|-----------|
| 6 | 0.000000 | 0.656600  | -1.012773 |
| 6 | 0.000000 | -0.656600 | -1.012773 |
| 1 | 0.000000 | 1.574566  | -1.576973 |
| 1 | 0.000000 | -1.574566 | -1.576973 |
| 6 | 0.000000 | 0.000000  | 0.253562  |
| 6 | 0.000000 | 0.000000  | 1.584929  |
| 1 | 0.000000 | -0.929536 | 2.138138  |
| 1 | 0.000000 | 0.929536  | 2.138138  |

pyridine in gas

|   |          |           |           |
|---|----------|-----------|-----------|
| 6 | 0.000000 | 0.000000  | -1.376382 |
| 6 | 0.000000 | 1.191369  | -0.668626 |
| 6 | 0.000000 | -1.191369 | -0.668626 |
| 6 | 0.000000 | 1.136940  | 0.718258  |
| 6 | 0.000000 | -1.136940 | 0.718258  |

|   |          |           |           |
|---|----------|-----------|-----------|
| 7 | 0.000000 | 0.000000  | 1.409356  |
| 1 | 0.000000 | 2.146102  | -1.174755 |
| 1 | 0.000000 | -2.146102 | -1.174755 |
| 1 | 0.000000 | 2.049771  | 1.302349  |
| 1 | 0.000000 | -2.049771 | 1.302349  |
| 1 | 0.000000 | 0.000000  | -2.457965 |

pyridine in cyclohexane

|   |          |           |           |
|---|----------|-----------|-----------|
| 6 | 0.000000 | 0.000000  | -1.375355 |
| 6 | 0.000000 | 1.192181  | -0.668334 |
| 6 | 0.000000 | -1.192181 | -0.668334 |
| 6 | 0.000000 | 1.138763  | 0.718521  |
| 6 | 0.000000 | -1.138763 | 0.718521  |
| 7 | 0.000000 | 0.000000  | 1.407618  |
| 1 | 0.000000 | 2.147034  | -1.174802 |
| 1 | 0.000000 | -2.147034 | -1.174802 |
| 1 | 0.000000 | 2.052357  | 1.301730  |
| 1 | 0.000000 | -2.052357 | 1.301730  |
| 1 | 0.000000 | 0.000000  | -2.457300 |

pyridine in water

|   |          |           |           |
|---|----------|-----------|-----------|
| 6 | 0.000000 | 0.000000  | -1.376202 |
| 6 | 0.000000 | 1.192096  | -0.668303 |
| 6 | 0.000000 | -1.192096 | -0.668303 |
| 6 | 0.000000 | 1.139865  | 0.717575  |
| 6 | 0.000000 | -1.139865 | 0.717575  |
| 7 | 0.000000 | 0.000000  | 1.411601  |
| 1 | 0.000000 | 2.147660  | -1.174452 |
| 1 | 0.000000 | -2.147660 | -1.174452 |
| 1 | 0.000000 | 2.056369  | 1.296186  |
| 1 | 0.000000 | -2.056369 | 1.296186  |
| 1 | 0.000000 | 0.000000  | -2.458724 |
